# Supplementary material for: Decoding the Mechanism behind the Pathogenesis of the Focal Segmental Glomerulosclerosis
Source: PubMed Central journal article supplement (PMC9175094; doi:10.1155/2022/1941038), 2022-04-19
Supplement: 1941038.f1.pdf [file 1941038.f1.pdf]

interactions

ACADL interacts with SLC27A2  
SLC27A2 interacts with STK10  
SLC27A2 interacts with TNFRSF1B  
SLC27A2 interacts with SLCO4C1  
ACSM3 interacts with FADS2  
FADS2 interacts with SLC27A2  
ACSM5 interacts with FADS2  
ACTN1 interacts with TGFB1  
ACTN1 interacts with HRG  
ACTN1 interacts with KNG1  
ACTN1 interacts with EGF  
ACTN1 interacts with FERMT3  
ACTN1 interacts with ALB  
ACTN1 interacts with PLG  
ACTN1 interacts with ZYX  
ACTN1 interacts with PDGFB  
ACTN1 interacts with VEGFC  
ACTN1 interacts with CAPN1  
TGFB1 interacts with VEGFC  
HRG interacts with PLAT  
HRG interacts with TGFB1  
HRG interacts with PLAUR  
HRG interacts with VEGFC  
HRG interacts with PDGFB  
HRG interacts with KNG1  
HRG interacts with PLG  
KNG1 interacts with TGFB1  
KNG1 interacts with WFS1  
KNG1 interacts with TAS2R10  
KNG1 interacts with S1PR4  
KNG1 interacts with TAS2R3  
KNG1 interacts with TAS2R4  
KNG1 interacts with TAS2R5  
KNG1 interacts with TAS2R19  
KNG1 interacts with MXRA8  
KNG1 interacts with TAS2R20  
KNG1 interacts with TAS2R14  
KNG1 interacts with LTBP1  
KNG1 interacts with MTNR1A  
KNG1 interacts with TAS2R31  
KNG1 interacts with P2RY13  
KNG1 interacts with VEGFC  
KNG1 interacts with PDGFB  
KNG1 interacts with MFGE8  
KNG1 interacts with PTGER3  
KNG1 interacts with TBXA2R  
KNG1 interacts with PLG  
EGF interacts with PPP2R5B  
EGF interacts with TGFB1  
EGF interacts with HBEGF  
EGF interacts with HRG  
EGF interacts with LRP2  
EGF interacts with SLC9A1  
EGF interacts with KNG1  
EGF interacts with FERMT3  
EGF interacts with IQSEC1  
EGF interacts with SYT11

EGF interacts with KIT  
EGF interacts with SGIP1  
EGF interacts with HCK  
EGF interacts with LYN  
EGF interacts with VEGFC  
EGF interacts with PDGFB  
EGF interacts with PLG  
FERMT3 interacts with TGFB1  
FERMT3 interacts with HRG  
FERMT3 interacts with KNG1  
FERMT3 interacts with VEGFC  
FERMT3 interacts with PLG  
FERMT3 interacts with PDGFB  
ALB interacts with SLC10A1  
ALB interacts with TGFB1  
ALB interacts with WFS1  
ALB interacts with HRG  
ALB interacts with EVA1A  
ALB interacts with KNG1  
ALB interacts with EGF  
ALB interacts with MFGE8  
ALB interacts with FERMT3  
ALB interacts with MXRA8  
ALB interacts with LTBP1  
ALB interacts with PDGFB  
ALB interacts with VEGFC  
ALB interacts with CSF1  
ALB interacts with PLG  
PLG interacts with TGFB1  
PLG interacts with VEGFC  
PDGFB interacts with TGFB1  
PDGFB interacts with PLG  
PDGFB interacts with RAPGEF1  
PDGFB interacts with SLC9A3R2  
PDGFB interacts with VEGFC  
CAPN1 interacts with ZYX  
ADAM12 interacts with EGF  
ADAMTS1 interacts with CFP  
ADAMTS1 interacts with SPON2  
CFP interacts with GGH  
CFP interacts with HBB  
CFP interacts with SPON2  
CFP interacts with LYZ  
CFP interacts with CTSS  
ADM interacts with GNG2  
ADM interacts with GNG7  
GNG2 interacts with HDAC5  
GNG2 interacts with GNRHR  
GNG2 interacts with TAS2R10  
GNG2 interacts with S1PR4  
GNG2 interacts with TAS2R3  
GNG2 interacts with TAS2R4  
GNG2 interacts with TAS2R5  
GNG2 interacts with KNG1  
GNG2 interacts with GPR65  
GNG2 interacts with GNRH1  
GNG2 interacts with MTNR1A  
GNG2 interacts with PRKACA

GNG2 interacts with GPR4  
GNG2 interacts with P2RY13  
GNG2 interacts with KCNJ15  
GNG2 interacts with TAS2R19  
GNG2 interacts with TAS2R20  
GNG2 interacts with TGM2  
GNG2 interacts with KCNJ16  
GNG2 interacts with TAS2R14  
GNG2 interacts with TAS2R31  
GNG2 interacts with GNG7  
GNG2 interacts with PTGER3  
GNG2 interacts with TBXA2R  
GNG7 interacts with GNRHR  
GNG7 interacts with TAS2R10  
GNG7 interacts with S1PR4  
GNG7 interacts with TAS2R3  
GNG7 interacts with TAS2R4  
GNG7 interacts with TAS2R5  
GNG7 interacts with KNG1  
GNG7 interacts with GPR65  
GNG7 interacts with GNRH1  
GNG7 interacts with MTNR1A  
GNG7 interacts with GPR4  
GNG7 interacts with P2RY13  
GNG7 interacts with KCNJ15  
GNG7 interacts with PTGER3  
GNG7 interacts with TAS2R19  
GNG7 interacts with TAS2R31  
GNG7 interacts with TAS2R20  
GNG7 interacts with TAS2R14  
GNG7 interacts with KCNJ16  
GNG7 interacts with TBXA2R  
GNA11 interacts with GPR4  
GNA11 interacts with GNAO1  
GNA11 interacts with GNRH1  
GNA11 interacts with GPR65  
GNA11 interacts with KNG1  
GNA11 interacts with GNRHR  
GNA11 interacts with PRKACA  
GNA11 interacts with TBXA2R  
GNA11 interacts with GNG7  
GNA11 interacts with GNG2  
HDAC5 interacts with HDAC7  
HDAC5 interacts with SNAI2  
HDAC5 interacts with NOTCH1  
HDAC5 interacts with TP53  
HDAC5 interacts with NCOR2  
GNRHR interacts with GPR65  
GNRHR interacts with GPR4  
GNRHR interacts with TBXA2R  
GNRHR interacts with KNG1  
GPR65 interacts with KNG1  
GPR65 interacts with TBXA2R  
GNRH1 interacts with GNRHR  
GNRH1 interacts with KNG1  
GNRH1 interacts with GPR65  
GNRH1 interacts with TBXA2R  
GNRH1 interacts with GPR4

GPR4 interacts with KNG1  
GPR4 interacts with GPR65  
GPR4 interacts with TBXA2R  
TBXA2R interacts with TGM2  
ARRB2 interacts with CD4  
ARRB2 interacts with GNA11  
ARRB2 interacts with LRP2  
ARRB2 interacts with EGF  
ARRB2 interacts with NOTCH1  
ARRB2 interacts with SYT11  
ARRB2 interacts with SGIP1  
ARRB2 interacts with ENG  
ARRB2 interacts with RELA  
ARRB2 interacts with TBXA2R  
ARRB2 interacts with LYN  
ARRB2 interacts with HCK  
AGXT interacts with SLC27A2  
AGXT interacts with GATM  
AGXT interacts with GLDC  
AGXT interacts with SHMT1  
AGXT interacts with PIPOX  
AGXT interacts with HAO2  
GATM interacts with PIPOX  
GATM interacts with SHMT1  
GATM interacts with GLDC  
GLDC interacts with PIPOX  
GLDC interacts with SHMT1  
PIPOX interacts with SLC27A2  
PIPOX interacts with SHMT1  
HAO2 interacts with SLC27A2  
HAO2 interacts with PIPOX  
EVA1A interacts with WFS1  
EVA1A interacts with MFGE8  
EVA1A interacts with KNG1  
EVA1A interacts with MXRA8  
EVA1A interacts with LTBP1  
MFGE8 interacts with WFS1  
MFGE8 interacts with MXRA8  
MXRA8 interacts with WFS1  
LTBP1 interacts with TGFB1  
LTBP1 interacts with WFS1  
LTBP1 interacts with MFGE8  
LTBP1 interacts with MXRA8  
CSF1 interacts with WFS1  
CSF1 interacts with EVA1A  
CSF1 interacts with KNG1  
CSF1 interacts with MFGE8  
CSF1 interacts with CSF1R  
CSF1 interacts with LTBP1  
CSF1 interacts with MXRA8  
CSF1 interacts with TNF  
ALPL interacts with COL4A2  
ALPL interacts with CD52  
ALPL interacts with LY6E  
ALPL interacts with CNTN5  
ALPL interacts with COL4A1  
COL4A2 interacts with COLGALT1  
COL4A2 interacts with PDGFB

COL4A2 interacts with NCAM1  
CD52 interacts with CNTN5  
CD52 interacts with LY6E  
CNTN5 interacts with LY6E  
COL4A1 interacts with COLGALT1  
COL4A1 interacts with PDGFB  
COL4A1 interacts with COL4A2  
COL4A1 interacts with NCAM1  
ANK3 interacts with TMED9  
ANK3 interacts with KDELR3  
ANK3 interacts with RAB1B  
ANK3 interacts with SCN3A  
KDELR3 interacts with RAB1B  
KDELR3 interacts with TMED9  
RAB1B interacts with RAB3D  
RAB1B interacts with RAB35  
RAB1B interacts with TMED9  
RAB1B interacts with RAB31  
RAB1B interacts with RUSC2  
ANTXR1 interacts with FURIN  
FURIN interacts with TGFB1  
FURIN interacts with NOTCH1  
FURIN interacts with MMP14  
FURIN interacts with PDGFB  
APLNR interacts with CX3CL1  
APLNR interacts with TAS2R10  
APLNR interacts with S1PR4  
APLNR interacts with TAS2R3  
APLNR interacts with TAS2R4  
APLNR interacts with TAS2R5  
APLNR interacts with KNG1  
APLNR interacts with CXCL16  
APLNR interacts with CCR1  
APLNR interacts with C3AR1  
APLNR interacts with MTNR1A  
APLNR interacts with P2RY13  
APLNR interacts with GNG2  
APLNR interacts with C5AR1  
APLNR interacts with PTGER3  
APLNR interacts with GNG7  
APLNR interacts with TAS2R19  
APLNR interacts with TAS2R31  
APLNR interacts with TAS2R20  
APLNR interacts with TAS2R14  
APLNR interacts with CCL5  
CX3CL1 interacts with TAS2R19  
CX3CL1 interacts with TAS2R10  
CX3CL1 interacts with TAS2R4  
CX3CL1 interacts with MTNR1A  
CX3CL1 interacts with TAS2R31  
CX3CL1 interacts with TAS2R3  
CX3CL1 interacts with TAS2R5  
CX3CL1 interacts with TAS2R20  
CX3CL1 interacts with GNG2  
CX3CL1 interacts with TAS2R14  
CX3CL1 interacts with S1PR4  
CX3CL1 interacts with GNG7  
CX3CL1 interacts with P2RY13

CX3CL1 interacts with PTGER3  
CX3CL1 interacts with KNG1  
CX3CL1 interacts with CXCL16  
TAS2R10 interacts with TAS2R19  
TAS2R10 interacts with TAS2R31  
TAS2R10 interacts with TAS2R3  
TAS2R10 interacts with TAS2R20  
TAS2R10 interacts with TAS2R14  
TAS2R10 interacts with TAS2R5  
TAS2R10 interacts with TAS2R4  
S1PR4 interacts with TAS2R10  
S1PR4 interacts with TAS2R19  
S1PR4 interacts with TAS2R5  
S1PR4 interacts with TAS2R20  
S1PR4 interacts with TAS2R4  
S1PR4 interacts with TAS2R31  
S1PR4 interacts with TAS2R3  
S1PR4 interacts with TAS2R14  
TAS2R3 interacts with TAS2R31  
TAS2R3 interacts with TAS2R4  
TAS2R3 interacts with TAS2R5  
TAS2R4 interacts with TAS2R5  
CXCL16 interacts with TAS2R10  
CXCL16 interacts with S1PR4  
CXCL16 interacts with TAS2R3  
CXCL16 interacts with TAS2R4  
CXCL16 interacts with TAS2R5  
CXCL16 interacts with KNG1  
CXCL16 interacts with PTGER3  
CXCL16 interacts with TAS2R19  
CXCL16 interacts with TAS2R20  
CXCL16 interacts with GNG2  
CXCL16 interacts with GNG7  
CXCL16 interacts with MTNR1A  
CXCL16 interacts with TAS2R14  
CXCL16 interacts with TAS2R31  
CXCL16 interacts with P2RY13  
CCR1 interacts with CX3CL1  
CCR1 interacts with TAS2R10  
CCR1 interacts with S1PR4  
CCR1 interacts with TAS2R3  
CCR1 interacts with TAS2R4  
CCR1 interacts with TAS2R5  
CCR1 interacts with KNG1  
CCR1 interacts with CXCL16  
CCR1 interacts with TAS2R19  
CCR1 interacts with MTNR1A  
CCR1 interacts with TAS2R31  
CCR1 interacts with TAS2R20  
CCR1 interacts with PTGER3  
CCR1 interacts with TAS2R14  
CCR1 interacts with GNG7  
CCR1 interacts with GNG2  
CCR1 interacts with P2RY13  
C3AR1 interacts with CX3CL1  
C3AR1 interacts with STK10  
C3AR1 interacts with RAB3D  
C3AR1 interacts with TAS2R10

C3AR1 interacts with S1PR4  
C3AR1 interacts with TAS2R3  
C3AR1 interacts with TAS2R4  
C3AR1 interacts with TAS2R5  
C3AR1 interacts with KNG1  
C3AR1 interacts with SLC27A2  
C3AR1 interacts with CD53  
C3AR1 interacts with CXCL16  
C3AR1 interacts with CCR1  
C3AR1 interacts with TAS2R19  
C3AR1 interacts with GNG7  
C3AR1 interacts with MTNR1A  
C3AR1 interacts with TAS2R31  
C3AR1 interacts with TAS2R20  
C3AR1 interacts with SLCO4C1  
C3AR1 interacts with TAS2R14  
C3AR1 interacts with GNG2  
C3AR1 interacts with PLAUR  
C3AR1 interacts with PTGER3  
C3AR1 interacts with TNFRSF1B  
C3AR1 interacts with C5AR1  
C3AR1 interacts with P2RY13  
C3AR1 interacts with CCL5  
C3AR1 interacts with CYBB  
MTNR1A interacts with TAS2R10  
MTNR1A interacts with S1PR4  
MTNR1A interacts with TAS2R3  
MTNR1A interacts with TAS2R4  
MTNR1A interacts with TAS2R5  
MTNR1A interacts with TAS2R19  
MTNR1A interacts with TAS2R31  
MTNR1A interacts with TAS2R20  
MTNR1A interacts with P2RY13  
MTNR1A interacts with TAS2R14  
MTNR1A interacts with PTGER3  
P2RY13 interacts with TAS2R10  
P2RY13 interacts with S1PR4  
P2RY13 interacts with TAS2R3  
P2RY13 interacts with TAS2R4  
P2RY13 interacts with TAS2R5  
P2RY13 interacts with TAS2R19  
P2RY13 interacts with TAS2R20  
P2RY13 interacts with TAS2R14  
P2RY13 interacts with TAS2R31  
P2RY13 interacts with PTGER3  
C5AR1 interacts with CX3CL1  
C5AR1 interacts with TAS2R10  
C5AR1 interacts with S1PR4  
C5AR1 interacts with TAS2R3  
C5AR1 interacts with TAS2R4  
C5AR1 interacts with TAS2R5  
C5AR1 interacts with KNG1  
C5AR1 interacts with CXCL16  
C5AR1 interacts with CCR1  
C5AR1 interacts with MTNR1A  
C5AR1 interacts with P2RY13  
C5AR1 interacts with GNG2  
C5AR1 interacts with GNG7

C5AR1 interacts with TAS2R19  
C5AR1 interacts with TAS2R31  
C5AR1 interacts with TAS2R20  
C5AR1 interacts with TAS2R14  
C5AR1 interacts with PTGER3  
C5AR1 interacts with CCL5  
PTGER3 interacts with TAS2R10  
PTGER3 interacts with S1PR4  
PTGER3 interacts with TAS2R3  
PTGER3 interacts with TAS2R4  
PTGER3 interacts with TAS2R5  
PTGER3 interacts with TAS2R19  
PTGER3 interacts with TAS2R31  
PTGER3 interacts with TAS2R20  
PTGER3 interacts with TAS2R14  
TAS2R19 interacts with TAS2R3  
TAS2R19 interacts with TAS2R4  
TAS2R19 interacts with TAS2R5  
TAS2R19 interacts with TAS2R20  
TAS2R19 interacts with TAS2R31  
TAS2R31 interacts with TAS2R4  
TAS2R31 interacts with TAS2R5  
TAS2R20 interacts with TAS2R3  
TAS2R20 interacts with TAS2R4  
TAS2R20 interacts with TAS2R5  
TAS2R20 interacts with TAS2R31  
TAS2R14 interacts with TAS2R3  
TAS2R14 interacts with TAS2R4  
TAS2R14 interacts with TAS2R5  
TAS2R14 interacts with TAS2R19  
TAS2R14 interacts with TAS2R31  
TAS2R14 interacts with TAS2R20  
CCL5 interacts with CX3CL1  
CCL5 interacts with TAS2R10  
CCL5 interacts with S1PR4  
CCL5 interacts with TAS2R3  
CCL5 interacts with TAS2R4  
CCL5 interacts with TAS2R5  
CCL5 interacts with KNG1  
CCL5 interacts with CXCL16  
CCL5 interacts with CCR1  
CCL5 interacts with MTNR1A  
CCL5 interacts with P2RY13  
CCL5 interacts with GNG2  
CCL5 interacts with PTGER3  
CCL5 interacts with GNG7  
CCL5 interacts with TAS2R19  
CCL5 interacts with TAS2R31  
CCL5 interacts with TNF  
CCL5 interacts with TAS2R20  
CCL5 interacts with TAS2R14  
APOC3 interacts with APOH  
APOC3 interacts with SDC3  
APOC3 interacts with LRP10  
APOC3 interacts with GPC6  
APOC3 interacts with LRP2  
APOC3 interacts with HSPG2  
APOH interacts with ECM1



LRP10 interacts with SDC3  
GPC6 interacts with LRP2  
GPC6 interacts with SDC3  
GPC6 interacts with LRP10  
GPC6 interacts with HSPG2  
LRP2 interacts with SGIP1  
LRP2 interacts with SDC3  
LRP2 interacts with SYT11  
HSPG2 interacts with LYZ  
HSPG2 interacts with LRP2  
HSPG2 interacts with NID1  
HSPG2 interacts with MFGE8  
HSPG2 interacts with MMP14  
HSPG2 interacts with PLG  
HSPG2 interacts with PDGFB  
HSPG2 interacts with SDC3  
HSPG2 interacts with LRP10  
ARAP3 interacts with RHOF  
ARAP3 interacts with RAC2  
RAC2 interacts with RHOF  
ARHGAP10 interacts with RAC2  
ARHGAP10 interacts with RHOF  
ARHGAP23 interacts with RAC2  
ARHGAP23 interacts with RHOF  
ARHGDIA interacts with RAC2  
ARHGDIA interacts with RHOF  
ARHGEF15 interacts with RAC2  
ARHGEF15 interacts with RHOF  
ARPC1B interacts with NCKAP1L  
ARPC1B interacts with PDGFB  
ARPC1B interacts with MYO1C  
ARPC1B interacts with WIPF1  
ARPC1B interacts with MYO9B  
NCKAP1L interacts with WIPF1  
MYO1C interacts with PDLIM4  
MYO1C interacts with MYO9B  
MYO9B interacts with RAC2  
MYO9B interacts with RHOF  
MYO9B interacts with SLIT2  
CD4 interacts with GNAO1  
CD4 interacts with LRP2  
CD4 interacts with SYT11  
CD4 interacts with SGIP1  
CD4 interacts with GNG2  
CD4 interacts with EGF  
NOTCH1 interacts with TP53  
NOTCH1 interacts with PLXND1  
SGIP1 interacts with SYT11  
ENG interacts with TGFB1  
RELA interacts with RELB  
RELA interacts with TGFB1  
RELA interacts with S100A12  
RELA interacts with TNF  
LYN interacts with PPP2R5B  
LYN interacts with PDGFB  
LYN interacts with WIPF1  
HCK interacts with PDGFB  
HCK interacts with LYN

ATP2A3 interacts with NOTCH1  
BAK1 interacts with TP53  
BAK1 interacts with BAX  
BAX interacts with TP53  
BAMBI interacts with TGFB1  
BAMBI interacts with BMP2  
BMP2 interacts with SOST  
BCL3 interacts with RELB  
BCL3 interacts with RELA  
BGN interacts with TGFB1  
BGN interacts with MYD88  
BGN interacts with SDC3  
BGN interacts with GPC6  
BGN interacts with HSPG2  
MYD88 interacts with RELA  
BST2 interacts with RAB3D  
BST2 interacts with EGR1  
BST2 interacts with IRF1  
BST2 interacts with SLCO4C1  
BST2 interacts with C3AR1  
BST2 interacts with OAS2  
BST2 interacts with OAS1  
BST2 interacts with SAMHD1  
BST2 interacts with ISG15  
RAB3D interacts with SLCO4C1  
EGR1 interacts with HDAC7  
EGR1 interacts with HDAC5  
EGR1 interacts with SAMHD1  
EGR1 interacts with OAS2  
EGR1 interacts with OAS1  
EGR1 interacts with SNAI2  
EGR1 interacts with ISG15  
EGR1 interacts with NFATC1  
EGR1 interacts with IRF1  
EGR1 interacts with TP53  
EGR1 interacts with FOS  
IRF1 interacts with NCAM1  
IRF1 interacts with SAMHD1  
IRF1 interacts with OAS1  
IRF1 interacts with OAS2  
IRF1 interacts with ISG15  
IRF1 interacts with RELA  
SLCO4C1 interacts with STK10  
SLCO4C1 interacts with TNFRSF1B  
OAS2 interacts with SAMHD1  
OAS1 interacts with SAMHD1  
OAS1 interacts with OAS2  
ISG15 interacts with SAMHD1  
ISG15 interacts with OAS2  
ISG15 interacts with OAS1  
STK10 interacts with TNFRSF1B  
CD53 interacts with STK10  
CD53 interacts with SLC27A2  
CD53 interacts with SLCO4C1  
CD53 interacts with MGAM  
CD53 interacts with PLAUR  
CD53 interacts with LAPTM5  
CD53 interacts with TNFRSF1B

CD53 interacts with FCER1G  
CD53 interacts with CYBB  
PLAUR interacts with STK10  
PLAUR interacts with SLC27A2  
PLAUR interacts with PLG  
PLAUR interacts with SLCO4C1  
PLAUR interacts with TNFRSF1B  
CYBB interacts with STK10  
CYBB interacts with RAC2  
CYBB interacts with NOX4  
CYBB interacts with SLC27A2  
CYBB interacts with FCER1G  
CYBB interacts with SLCO4C1  
CYBB interacts with PLAUR  
CYBB interacts with TNFRSF1B  
CYBB interacts with MGAM  
CBX6 interacts with HDAC7  
CBX6 interacts with HDAC5  
CBX6 interacts with EGR1  
CBX6 interacts with TP53  
CBX6 interacts with CHD3  
CBX6 interacts with SNAI2  
HDAC7 interacts with SNAI2  
HDAC7 interacts with NOTCH1  
HDAC7 interacts with TP53  
HDAC7 interacts with NCOR2  
CHD3 interacts with HDAC7  
CHD3 interacts with HDAC5  
CHD3 interacts with EGR1  
CHD3 interacts with TP53  
CHD3 interacts with TAF1D  
CHD3 interacts with SNAI2  
SNAI2 interacts with TP53  
TNF interacts with USP2  
TNF interacts with TNFRSF12A  
TNF interacts with TNFRSF1B  
CCND1 interacts with PSMD5  
CCND1 interacts with LYN  
CCND1 interacts with GATA3  
CCND1 interacts with TP53  
CCND1 interacts with FOS  
CCND1 interacts with RELA  
CCND1 interacts with NOTCH1  
PSMD5 interacts with TNFRSF1B  
PSMD5 interacts with TNFRSF12A  
PSMD5 interacts with RELB  
PSMD5 interacts with RELA  
PSMD5 interacts with TNF  
PSMD5 interacts with TP53  
FOS interacts with TGFB1  
FOS interacts with TP53  
FOS interacts with NOTCH1  
FOS interacts with UGT1A6  
FOS interacts with GSTA2  
FOS interacts with LYN  
FOS interacts with GATA3  
FOS interacts with RELA  
FOS interacts with TNF

FOS interacts with NFATC1  
GNAO1 interacts with S1PR4  
GNAO1 interacts with GNG7  
GNAO1 interacts with GNG2  
FCER1G interacts with TYROBP  
FCER1G interacts with MGAM  
FCER1G interacts with WIPF1  
FCER1G interacts with FOS  
FCER1G interacts with HCLS1  
FCER1G interacts with INPP5D  
FCER1G interacts with LYN  
CEBPD interacts with PPARGC1A  
CEBPD interacts with MED25  
MED25 interacts with PPARGC1A  
MED25 interacts with PCK1  
MED25 interacts with NCOR2  
GGH interacts with PYCARD  
GGH interacts with VAT1  
GGH interacts with PLAC8  
GGH interacts with RNASE2  
GGH interacts with HBB  
GGH interacts with GSTA2  
GGH interacts with GSTA1  
GGH interacts with MAN2B1  
GGH interacts with LYZ  
HBB interacts with LYZ  
LYZ interacts with PYCARD  
LYZ interacts with VAT1  
LYZ interacts with MAN2B1  
LYZ interacts with PLAC8  
LYZ interacts with RNASE2  
CTSS interacts with GGH  
CTSS interacts with LYZ  
CTSS interacts with HBB  
CTSS interacts with HSPG2  
CLEC4E interacts with FCER1G  
CLEC4E interacts with LYN  
COL10A1 interacts with COLGALT1  
COL10A1 interacts with COL1A2  
COL10A1 interacts with COL4A1  
COL10A1 interacts with COL4A2  
COL1A2 interacts with COLGALT1  
COL1A2 interacts with FLT4  
COL1A2 interacts with COL4A2  
COL1A2 interacts with COL4A1  
FLT4 interacts with PDGFB  
FLT4 interacts with ITGA5  
FLT4 interacts with VEGFC  
NCAM1 interacts with OAS2  
NCAM1 interacts with OAS1  
CSF1R interacts with TYROBP  
CSNK1E interacts with TP53  
CSNK1E interacts with PRKACA  
CSNK1E interacts with RRP7A  
CSNK1E interacts with RPS26  
PRKACA interacts with RARG  
PRKACA interacts with SLC8A1  
PRKACA interacts with TBXA2R

PRKACA interacts with RELA  
RPS26 interacts with SMG9  
RPS26 interacts with RRP7A  
RPS26 interacts with UPF1  
CUBN interacts with LRP2  
CYP17A1 interacts with CYP3A5  
CYP3A5 interacts with CYP4A11  
CYP2B6 interacts with CYP3A5  
CYP2B6 interacts with UGT1A6  
CYP2B6 interacts with CYP4A11  
CYP2B6 interacts with UGT1A9  
CYP2B6 interacts with UGT1A5  
CYP2B6 interacts with UGT1A4  
UGT1A6 interacts with UGT1A7  
UGT1A6 interacts with UGT1A9  
CYP4A11 interacts with CYP4A22  
UGT1A4 interacts with UGT1A6  
UGT1A4 interacts with UGT1A9  
UGT1A4 interacts with UGT1A7  
DDX5 interacts with GATA3  
DDX5 interacts with PPIL1  
DDX5 interacts with SRSF5  
DDX5 interacts with MAGOHB  
DDX5 interacts with TP53  
PPIL1 interacts with SRSF5  
MAGOHB interacts with SMG9  
MAGOHB interacts with RPS26  
MAGOHB interacts with SRSF5  
MAGOHB interacts with PPIL1  
MAGOHB interacts with UPF1  
DEPDC7 interacts with RAC2  
DEPDC7 interacts with RHOF  
DLL4 interacts with NOTCH1  
DMGDH interacts with PIPOX  
DUSP1 interacts with FOS  
PPP2R5B interacts with PSMD5  
HBEGF interacts with PRLR  
KIT interacts with PIK3C2B  
KIT interacts with LYN  
KIT interacts with SH2B3  
KIT interacts with SNAI2  
NFATC1 interacts with PRKACA  
NFATC1 interacts with TNF  
F11 interacts with KNG1  
HCLS1 interacts with LYN  
INPP5D interacts with PIK3C2B  
ITGA5 interacts with PLAUR  
FTCD interacts with SHMT1  
MMP14 interacts with NID1  
GBP3 interacts with IRF1  
GBP3 interacts with ICAM1  
GBP3 interacts with OAS2  
GBP3 interacts with NCAM1  
GBP3 interacts with IFI30  
GBP3 interacts with OAS1  
ICAM1 interacts with IRF1  
ICAM1 interacts with OAS2  
ICAM1 interacts with OAS1

ICAM1 interacts with IFI30  
ICAM1 interacts with TNF  
IFI30 interacts with IRF1  
IFI30 interacts with OAS2  
IFI30 interacts with NCAM1  
IFI30 interacts with OAS1  
PYCARD interacts with VAT1  
PYCARD interacts with RNASE2  
PLAC8 interacts with PYCARD  
PLAC8 interacts with RNASE2  
PLAC8 interacts with VAT1  
RNASE2 interacts with VAT1  
GSTA1 interacts with GSTA2  
MAN2B1 interacts with PYCARD  
MAN2B1 interacts with RNASE2  
MAN2B1 interacts with VAT1  
MAN2B1 interacts with PLAC8  
KCNJ15 interacts with KCNJ16  
HBA1 interacts with HBA2  
HBA1 interacts with RPS26  
HBA1 interacts with HBB  
HBA2 interacts with RPS26  
HBA2 interacts with HBB  
HCST interacts with TYROBP  
NCOR2 interacts with PPARGC1A  
NCOR2 interacts with NOTCH1  
NCOR2 interacts with PCK1  
NCOR2 interacts with SKI  
NCOR2 interacts with RARG  
PLAT interacts with PLG  
IL15RA interacts with IL2RB  
IL15RA interacts with IL2RG  
IL2RB interacts with IL3RA  
IL2RB interacts with INPP5D  
IL2RB interacts with IL2RG  
IL2RG interacts with IL3RA  
IL2RG interacts with INPP5D  
IL3RA interacts with PRKACA  
IL3RA interacts with INPP5D  
KMT2D interacts with RARG  
KMT2D interacts with MAFB  
KMT2D interacts with PRMT6  
KPNA2 interacts with NFATC1  
SMG9 interacts with UPF1  
MAP4K2 interacts with TNF  
PCK1 interacts with PPARGC1A  
MFNG interacts with NOTCH1  
SLIT2 interacts with SLIT3  
PLXND1 interacts with SEMA3F  
PLXND1 interacts with SEMA4G  
PLXND1 interacts with SEMA7A  
NR1D1 interacts with PPARGC1A  
PLAGL1 interacts with TP53  
PLCD1 interacts with TGM2  
PLEKHG2 interacts with RAC2  
PLEKHG2 interacts with RHOF  
PREX1 interacts with RAC2  
PREX1 interacts with RHOF

TNFRSF12A interacts with TNFRSF1B  
RAB35 interacts with RAB3D  
RAB31 interacts with RAB3D  
RAB31 interacts with RAB35  
ROBO4 interacts with SLIT3  
ROBO4 interacts with SLIT2  
TNFRSF10C interacts with TP53  
UGT1A7 interacts with UGT1A9
