# Supplementary material for: Decoding the Mechanism behind the Pathogenesis of the Focal Segmental Glomerulosclerosis
Source: PubMed Central journal article supplement (PMC9175094; doi:10.1155/2022/1941038), 2022-04-19
Supplement: 1941038.f2.pdf [file 1941038.f2.pdf]

| Gene     | Type |
|----------|------|
| FADS2    | up   |
| ACTN1    | up   |
| TGFB1    | up   |
| FERMT3   | up   |
| ZYX      | up   |
| PDGFB    | up   |
| VEGFC    | up   |
| CAPN1    | up   |
| ADAM12   | up   |
| ADAMTS1  | up   |
| CFP      | up   |
| SPON2    | up   |
| ADM      | up   |
| GNG2     | up   |
| GNG7     | up   |
| GNA11    | up   |
| HDAC5    | up   |
| GPR65    | up   |
| GPR4     | up   |
| TBXA2R   | up   |
| ARRB2    | up   |
| WFS1     | up   |
| MFGE8    | up   |
| MXRA8    | up   |
| LTBP1    | up   |
| CSF1     | up   |
| COL4A2   | up   |
| CD52     | up   |
| LY6E     | up   |
| COL4A1   | up   |
| TMED9    | up   |
| KDEL3    | up   |
| RAB1B    | up   |
| ANTXR1   | up   |
| FURIN    | up   |
| APLNR    | up   |
| CX3CL1   | up   |
| S1PR4    | up   |
| CXCL16   | up   |
| CCR1     | up   |
| C3AR1    | up   |
| P2RY13   | up   |
| C5AR1    | up   |
| CCL5     | up   |
| SDC3     | up   |
| LRP10    | up   |
| GPC6     | up   |
| HSPG2    | up   |
| ECM1     | up   |
| ARAP3    | up   |
| RHOF     | up   |
| RAC2     | up   |
| ARHGAP23 | up   |
| ARHGDI1  | up   |
| ARHGEF15 | up   |
| ARPC1B   | up   |
| NCKAP1L  | up   |

|          |    |
|----------|----|
| MYO1C    | up |
| WIPF1    | up |
| MYO9B    | up |
| CD4      | up |
| NOTCH1   | up |
| SYT11    | up |
| ENG      | up |
| RELA     | up |
| LYN      | up |
| HCK      | up |
| ATP2A3   | up |
| BAK1     | up |
| TP53     | up |
| BAX      | up |
| BAMBI    | up |
| BMP2     | up |
| BCL3     | up |
| RELB     | up |
| BGN      | up |
| MYD88    | up |
| SOST     | up |
| BST2     | up |
| RAB3D    | up |
| IRF1     | up |
| OAS2     | up |
| OAS1     | up |
| SAMHD1   | up |
| ISG15    | up |
| STK10    | up |
| CD53     | up |
| PLAUR    | up |
| TNFRSF1B | up |
| CYBB     | up |
| CBX6     | up |
| HDAC7    | up |
| CHD3     | up |
| SNAI2    | up |
| TNF      | up |
| CCND1    | up |
| PSMD5    | up |
| GATA3    | up |
| GNAO1    | up |
| LAPTM5   | up |
| FCER1G   | up |
| MED25    | up |
| HBB      | up |
| LYZ      | up |
| CTSS     | up |
| COLGALT1 | up |
| COL1A2   | up |
| FLT4     | up |
| NCAM1    | up |
| CSF1R    | up |
| TYROBP   | up |
| CSNK1E   | up |
| PRKACA   | up |
| RRP7A    | up |
| RPS26    | up |

|           |    |
|-----------|----|
| PPIL1     | up |
| DLL4      | up |
| PPP2R5B   | up |
| HBEGF     | up |
| SLC9A1    | up |
| IQSEC1    | up |
| NFATC1    | up |
| HCLS1     | up |
| INPP5D    | up |
| ITGA5     | up |
| MMP14     | up |
| GBP3      | up |
| ICAM1     | up |
| IFI30     | up |
| PYCARD    | up |
| VAT1      | up |
| PLAC8     | up |
| RNASE2    | up |
| MAN2B1    | up |
| TGM2      | up |
| HBA1      | up |
| HBA2      | up |
| HCST      | up |
| NCOR2     | up |
| PLAT      | up |
| NID1      | up |
| IL15RA    | up |
| IL2RB     | up |
| IL2RG     | up |
| IL3RA     | up |
| PIK3C2B   | up |
| SH2B3     | up |
| KMT2D     | up |
| RARG      | up |
| MAFB      | up |
| PRMT6     | up |
| KPNA2     | up |
| SMG9      | up |
| UPF1      | up |
| MAP4K2    | up |
| MFNG      | up |
| PDLIM4    | up |
| SKI       | up |
| PLXND1    | up |
| NR1D1     | up |
| RAPGEF1   | up |
| SLC9A3R2  | up |
| PLCD1     | up |
| PLEKHG2   | up |
| SEMA3F    | up |
| SEMA4G    | up |
| SEMA7A    | up |
| PREX1     | up |
| TNFRSF12A | up |
| RAB35     | up |
| RAB31     | up |
| RUSC2     | up |
| ROBO4     | up |

|           |      |
|-----------|------|
| SLIT3     | up   |
| TNFRSF10C | up   |
| ACADL     | down |
| SLC27A2   | down |
| ACSM3     | down |
| ACSM5     | down |
| HRG       | down |
| KNG1      | down |
| EGF       | down |
| ALB       | down |
| PLG       | down |
| GNRHR     | down |
| GNRH1     | down |
| AGXT      | down |
| GATM      | down |
| GLDC      | down |
| SHMT1     | down |
| PIPOX     | down |
| HAO2      | down |
| SLC10A1   | down |
| EVA1A     | down |
| ALPL      | down |
| CNTN5     | down |
| ANK3      | down |
| SCN3A     | down |
| TAS2R10   | down |
| TAS2R3    | down |
| TAS2R4    | down |
| TAS2R5    | down |
| MTNR1A    | down |
| PTGER3    | down |
| TAS2R19   | down |
| TAS2R31   | down |
| TAS2R20   | down |
| TAS2R14   | down |
| APOC3     | down |
| APOH      | down |
| LRP2      | down |
| ARHGAP10  | down |
| SGIP1     | down |
| EGR1      | down |
| SLCO4C1   | down |
| FOS       | down |
| MGAM      | down |
| CEBPD     | down |
| PPARGC1A  | down |
| GGH       | down |
| TAF1D     | down |
| CLEC4E    | down |
| COL10A1   | down |
| CUBN      | down |
| NOX4      | down |
| CYP17A1   | down |
| CYP3A5    | down |
| CYP2B6    | down |
| UGT1A6    | down |
| CYP4A11   | down |
| UGT1A9    | down |

|         |      |
|---------|------|
| UGT1A5  | down |
| UGT1A4  | down |
| CYP4A22 | down |
| DDX5    | down |
| SRSF5   | down |
| MAGOHB  | down |
| DEPDC7  | down |
| DMGDH   | down |
| DUSP1   | down |
| KIT     | down |
| F11     | down |
| GSTA2   | down |
| FTCD    | down |
| GSTA1   | down |
| KCNJ15  | down |
| KCNJ16  | down |
| PRLR    | down |
| PCK1    | down |
| SLIT2   | down |
| PLAGL1  | down |
| SLC8A1  | down |
| S100A12 | down |
| USP2    | down |
| UGT1A7  | down |
